# Supplementary material
Source: publisher figshare collection journal article supplement (https://sage.figshare.com/ndownloader/files/17682407)
Supplement: Supplementary file 1 [file 17682407]

## **SUPPLEMENTARY MATERIAL (1)**

**Task 1:** Please rank the categories that you think are important to collect for **clinical purposes** in a combined rehabilitation programme (1 being the most important)

- Health related quality of life
- Anxiety & depression
- Exercise capacity
- Frailty
- Peripheral muscle assessment (to include strength/mass)
- Symptom evaluation
- Cardio-metabolic risk
- Physical activity
- Disease specific knowledge
- Self-efficacy
- Functional capacity (activities of daily living)
- Organ impairment
- Carer's engagement

**Task 2:** Please rank the categories that you think are important to collect for **research purposes** in a combined rehabilitation programme (1 being the most important)

- Health related quality of life
- Anxiety & depression
- Exercise capacity
- Frailty

- Peripheral muscle assessment (to include strength/mass)
- Symptom evaluation
- Cardio-metabolic risk
- Physical activity
- Disease specific knowledge
- Self-efficacy
- Functional capacity (activities of daily living)
- Organ impairment
- Carer's engagement

**Task 3:** Do you think a measure assessing “health related quality of life” should be used for clinical purposes?

- Yes
- No

Do you think a measure assessing “health related quality of life” should be used for research purposes?

- Yes
- No

*(completed for all categories)*

**Task 4: a)** Clinical purpose: please rate the importance of “health related quality of life” as a baseline/ profiling measure

|                       |                       |                       |                       |                       |                       |                       |
|-----------------------|-----------------------|-----------------------|-----------------------|-----------------------|-----------------------|-----------------------|
| Not at all important  | Low importance        | Slightly important    | Neutral               | Moderately important  | Very important        | Extremely important   |
| <input type="radio"/> |

Research purpose: please rate the importance of “health related quality of life” as a baseline/  
profiling measure

|                       |                       |                       |                       |                       |                       |                       |
|-----------------------|-----------------------|-----------------------|-----------------------|-----------------------|-----------------------|-----------------------|
| Not at all important  | Low importance        | Slightly important    | Neutral               | Moderately important  | Very important        | Extremely important   |
| <input type="radio"/> |

**Task 4: b)** Clinical purpose: please rate the importance of “health related quality of life” as  
an outcome measure

|                       |                       |                       |                       |                       |                       |                       |
|-----------------------|-----------------------|-----------------------|-----------------------|-----------------------|-----------------------|-----------------------|
| Not at all important  | Low importance        | Slightly important    | Neutral               | Moderately important  | Very important        | Extremely important   |
| <input type="radio"/> |

Research purpose: please rate the importance of “health related quality of life” as an outcome  
measure

|                       |                       |                       |                       |                       |                       |                       |
|-----------------------|-----------------------|-----------------------|-----------------------|-----------------------|-----------------------|-----------------------|
| Not at all important  | Low importance        | Slightly important    | Neutral               | Moderately important  | Very important        | Extremely important   |
| <input type="radio"/> |

*(completed for all categories)*

## SUPPLEMENTARY MATERIAL (2)

Supplementary Table A: The number of stakeholders that voted the importance of each category as a baseline patient evaluation or outcome measure for clinical or research purposes within combined rehabilitation

|                                       | <b>Clinical</b>  |         | <b>Research</b>  |         |
|---------------------------------------|------------------|---------|------------------|---------|
|                                       | Baseline patient | Outcome | Baseline patient | Outcome |
|                                       | evaluation       |         | evaluation       |         |
| <b>Health Related Quality of Life</b> | 18               | 18      | 16               | 18      |
| <b>Anxiety &amp; depression</b>       | 16               | 17      | 18               | 17      |
| <b>Exercise capacity</b>              | 17               | 18      | 17               | 18      |
| <b>Frailty</b>                        | 17               | 18      | 17               | 18      |
| <b>Peripheral muscle assessment</b>   | 17               | 18      | 17               | 18      |
| <b>Symptom evaluation</b>             | 17               | 18      | 17               | 18      |
| <b>Cardio-metabolic risk</b>          | 17               | 18      | 17               | 18      |
| <b>Physical activity</b>              | 17               | 18      | 17               | 18      |
| <b>Disease specific knowledge</b>     | 17               | 18      | 16               | 18      |
| <b>Self efficacy</b>                  | 17               | 18      | 18               | 17      |
| <b>Functional capacity</b>            | 17               | 17      | 17               | 17      |
| <b>Organ impairment</b>               | 17               | 17      | 17               | 17      |
| <b>Carer engagement</b>               | 17               | 17      | 17               | 17      |
